# Supplementary material
Source: PubMed Central journal article supplement (PMC3497573)
Supplement: tjp0590-5211-SD1.pdf [file tjp0590-5211-SD1.pdf]

**Fig. 1S.** Representative 2D gels of muscle samples from vastus lateralis muscle used for proteomic analysis (subject group A). Thirteen cm IPG gels strips, pH 3-11 NL (non linear), were used in the first dimension and SDS gels (15% T, 2.5% C) were used in the second dimension. The protein spots found to be differentially expressed are circled and numbered. The numbers enable to identify the spots in Table 1.

**Fig. 2S.** The effect of 24 days BR on the content in representative metabolic enzymes (lactate dehydrogenase, aldolase A, triosephosphate isomerase) and antioxidant defense systems (SOD1, peroxiredoxin 3 and Hsp70) in vastus lateralis muscle of subject group B. 24 d BR = post-24d BR. \* significantly different from pre-BR.

**Table 1S.** Differentially expressed proteins and related changes in vastus lateralis muscles (subject group A) following 8 and 35 d BR compared to pre-BR. In the table are showed: the spot number corresponding to the number reported in Fig.2; the protein name; the accession number corresponding to Expasy; the estimated pI in 2D gel; the estimated Molecular Weight in 2D gel; the related fold changes of proteins following 8 and 35 days of BR are expressed in average ratio of changes relative to pre-BR; MOWSE score.

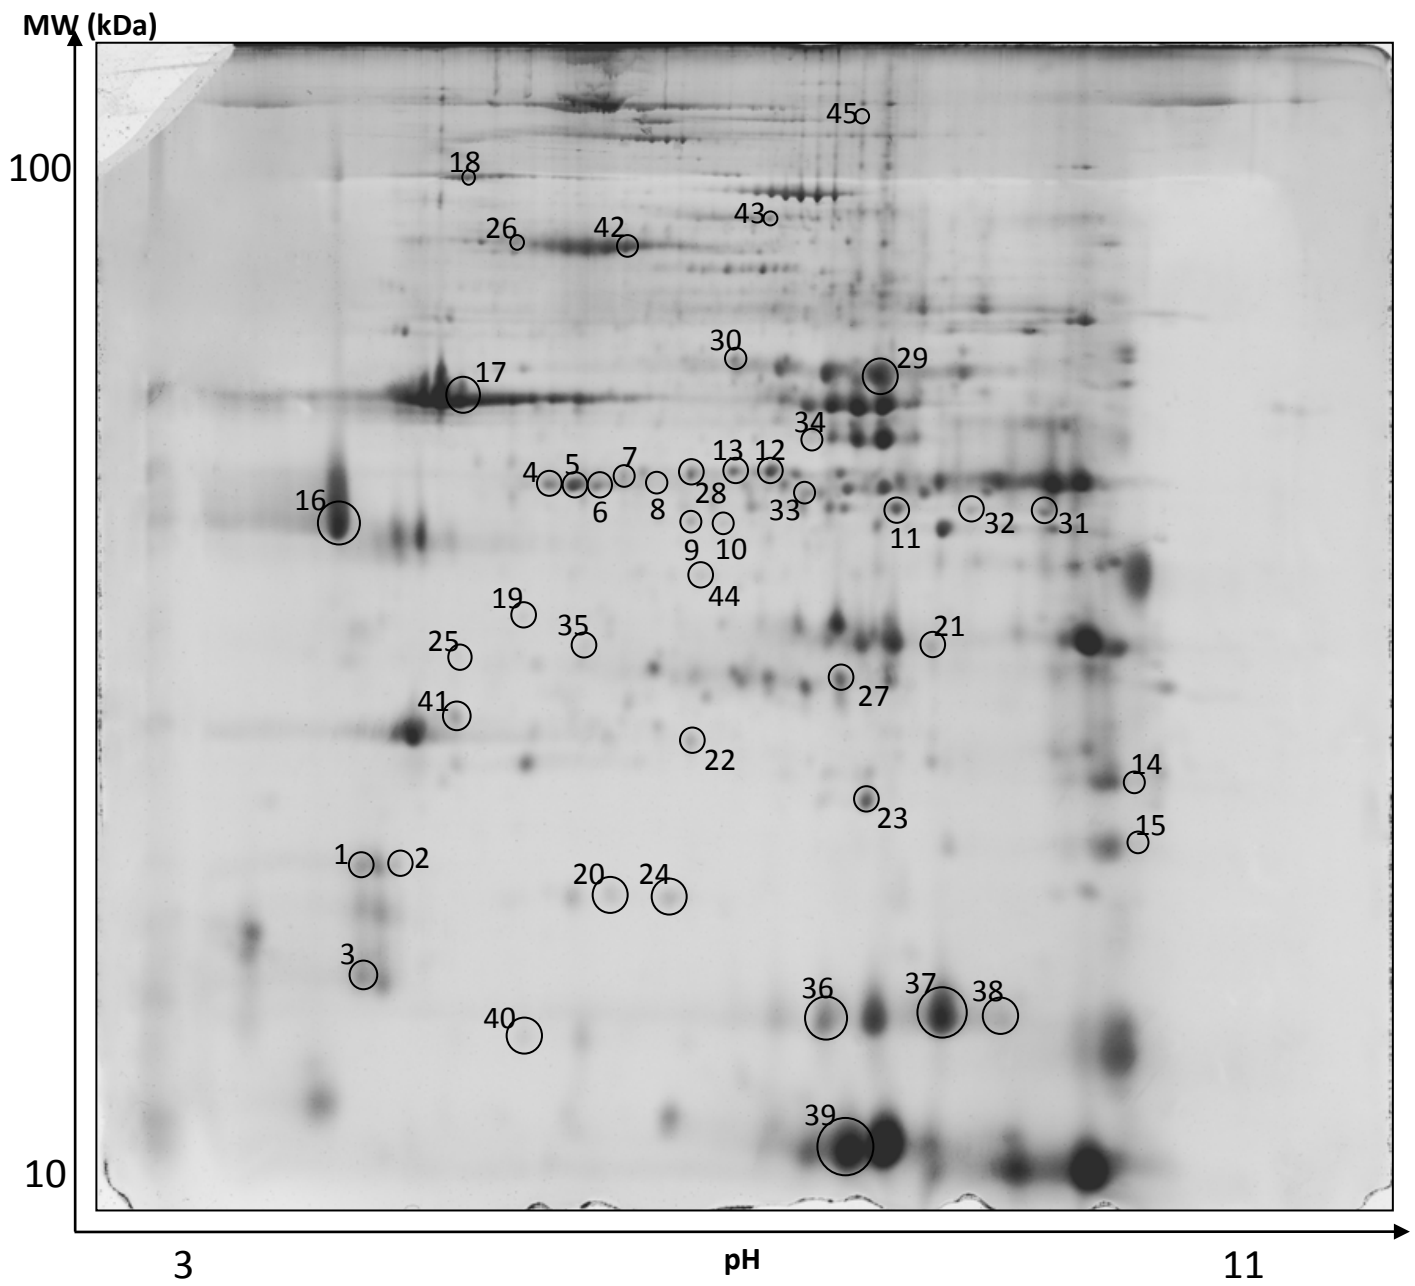

Fig. S1

**A**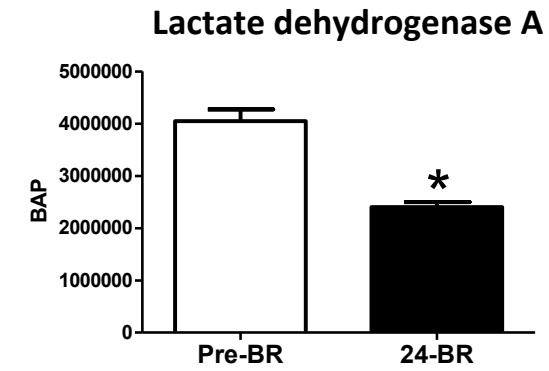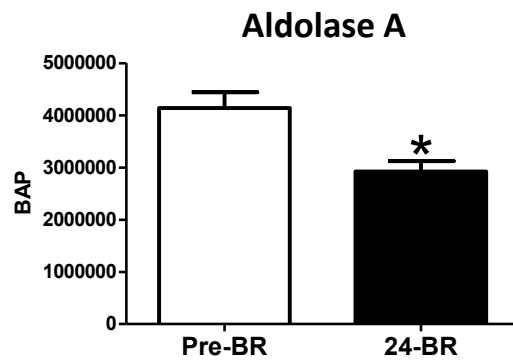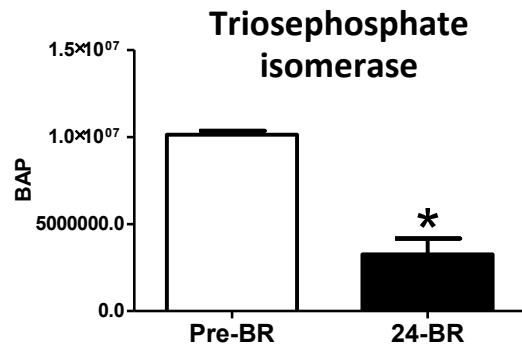**B**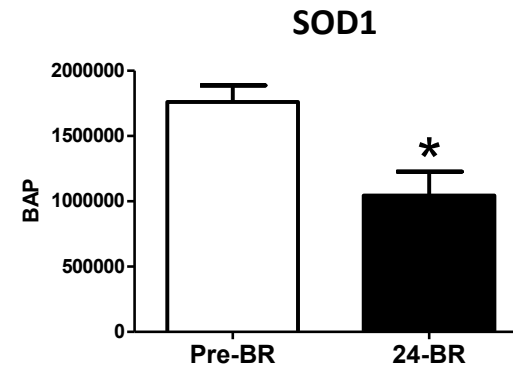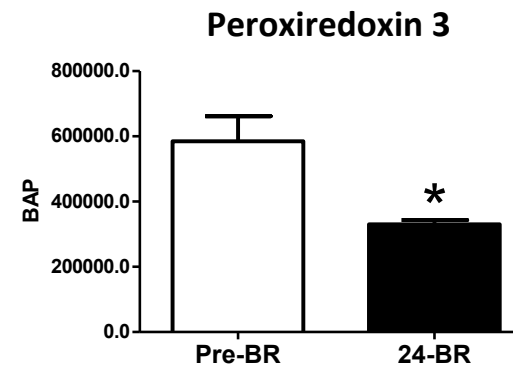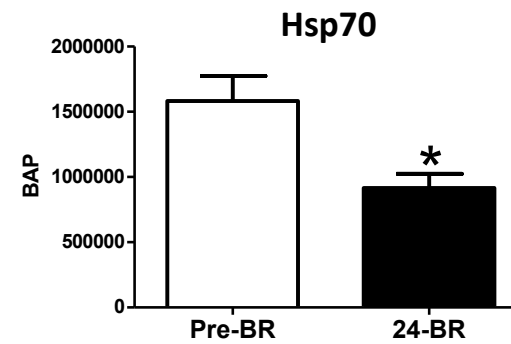

Fig. S2

**Table 1S.** Differentially expressed proteins and related changes in vastus lateralis muscles (subject group A) following 8 and 35 d BR compared to pre-BR. In the table are showed: the spot number corresponding to the number reported in Fig.2; the protein name; the accession number corresponding to Expasy; the estimated pI in 2D gel; the estimated Molecular Weight in 2D gel; the related fold changes of proteins following 8 and 35 days of BR are expressed in average ratio of changes relative to pre-BR; MOWSE score.

|    | PROTEINS                           | Access num. | Estimated pI in 2D gel | Estimated MW in 2D gel | Fold change 8-BR | Fold change 35-BR | score |
|----|------------------------------------|-------------|------------------------|------------------------|------------------|-------------------|-------|
|    | <b>MYOFIBRILLAR PROTEINS</b>       |             |                        |                        |                  |                   |       |
| 1  | MLC-2slow                          | Q7M2V4      | 4.92                   | 18777                  | -1.92            | -1.99             | 91    |
| 2  | MLC-2slow                          | Q7M2V4      | 4.48                   | 18800                  | -2.26            | -1.99             | 280   |
| 3  | MLC-2f                             | Q96A32      | 4.79                   | 17734                  | -1.62            | -1.12             | 98    |
| 4  | Troponin T, slow skeletal muscle   | P13805      | 5.72                   | 36350                  | -1.98            | -2.46             | 102   |
| 5  | Troponin T, slow skeletal muscle   | P13805      | 5.8                    | 36350                  | -1.74            | -2.43             | 300   |
| 6  | Troponin T, slow skeletal muscle   | P13805      | 5.87                   | 36350                  | -2.25            | -1.38             | 98    |
| 7  | Troponin T, slow skeletal muscle   | P13805      | 5.92                   | 36250                  | 1.43             | 1.49              | 158   |
| 8  | Troponin T, slow skeletal muscle   | P13805      | 6.01                   | 36250                  | 1.57             | 2.46              | 287   |
| 9  | Troponin T slow skeletal muscle    | P13805      | 6.18                   | 32979                  | -2.88            | -3.11             | 166   |
| 10 | Troponin T, slow skeletal muscle   | P13805      | 6.29                   | 32582                  | -2.44            | -2.51             | 330   |
| 11 | Troponin T fast                    | P45378      | 6.86                   | 33737                  | -1.16            | -4.74             | 423   |
| 12 | Troponin T fast                    | P45378      | 6.44                   | 37993                  | -1.43            | -2.62             | 97    |
| 13 | Troponin T fast                    | P45378      | 6.19                   | 37630                  | -1.52            | -3.37             | 177   |
| 14 | Troponin I fast                    | P48788      | 9.36                   | 20829                  | -2.77            | -4.27             | 297   |
| 15 | Troponin I fast                    | P48788      | 9.37                   | 19426                  | -1.23            | -4.15             | 246   |
| 16 | Tropomyosin $\alpha$ -chain        | P06753      | 4.68                   | 32818                  | -1.94            | -1.92             | 221   |
| 17 | Actin                              | P68133      | 5.10                   | 44020                  | -0.44            | -0.87             | 350   |
| 18 | $\alpha$ -Actinin 2                | P35609      | 5.31                   | 105007                 | -1.03            | 1.34              | 225   |
| 19 | Actin alpha cardiac                | P68032      | 5.63                   | 29396                  | -1.73            | -1.367            | 335   |
|    |                                    |             |                        |                        |                  |                   |       |
|    | <b>ANTIOXIDANT DEFENCE SYSTEMS</b> |             |                        |                        |                  |                   |       |
| 20 | Cu/Zn superoxide dismutase         | P00441      | 5.82                   | 18822                  | -1.46            | -1.63             | 320   |
| 21 | Carbonic anhydrase III             | P07451      | 7.06                   | 29369                  | -1.82            | -3.08             | 390   |

|    |                                      |        |      |        |       |       |      |
|----|--------------------------------------|--------|------|--------|-------|-------|------|
| 22 | Peroxiredoxin 3                      | P30048 | 6.19 | 22942  | -1.53 | -1.32 | 247  |
| 23 | $\alpha$ - $\beta$ crystallin        | P02511 | 6.76 | 20222  | -2.00 | -1.77 | 588  |
| 24 | HSP B6                               | O14558 | 6.14 | 18742  | -1.45 | -1.92 | 114  |
| 25 | HspB1                                | P04792 | 5.29 | 28811  | -3.43 | -1.65 | 423  |
| 26 | Hsp 70kDa                            | P48723 | 5.52 | 84418  | -2.31 | -2.17 | 1414 |
|    |                                      |        |      |        |       |       |      |
|    | <b>ENERGY PRODUCTION SYSTEMS</b>     |        |      |        |       |       |      |
|    | <b>Glycolytic enzymes</b>            |        |      |        |       |       |      |
| 27 | Triosephosphate isomerase            | P60174 | 6.69 | 26235  | -1.61 | -2.18 | 89   |
| 28 | Beta enolase                         | P13929 | 6.8  | 53073  | -2.98 | -1.87 | 164  |
| 29 | Beta enolase                         | P13929 | 6.8  | 53073  | 1.90  | -1.4  | 148  |
| 30 | Beta enolase                         | P13929 | 6.32 | 55166  | -1.94 | -1.2  | 174  |
| 31 | Lactate dehydrogenase chain A        | P00338 | 8.39 | 33737  | -2.07 | -2.31 | 268  |
| 32 | Aldolase A                           | P04075 | 7.39 | 33737  | -2.04 | -2.03 | 263  |
|    | <b>Oxidative enzymes</b>             |        |      |        |       |       |      |
| 33 | Malate dehydrogenase                 | P40925 | 6.57 | 36050  | -2.29 | -3.62 | 267  |
|    |                                      |        |      |        |       |       |      |
| 34 | Creatin kinase                       | P06732 | 6.56 | 43260  | -2.46 | -1.10 | 132  |
| 35 | Guanidinoacetate N-methyltransferase | Q14353 | 5.85 | 29140  | 1.45  | 1.42  | 100  |
|    |                                      |        |      |        |       |       |      |
|    | <b>TRANSPORT PROTEINS</b>            |        |      |        |       |       |      |
| 36 | Myoglobin                            | P02144 | 6.70 | 17179  | -1.26 | -2.35 | 494  |
| 37 | Myoglobin                            | P02144 | 7.14 | 17150  | -1.33 | -2.54 | 385  |
| 38 | Myoglobin                            | P02144 | 7.94 | 17152  | -2.19 | 1.27  | 342  |
| 39 | Hemoglobin subunit beta              | P68871 | 6.71 | 16460  | -1.41 | -1.87 | 226  |
| 40 | Fatty acid-binding protein           | Q6IBD7 | 5.50 | 16900  | -1.52 | -1.09 | 81   |
| 41 | Apolipoprotein chain A               | P02647 | 5.28 | 23105  | -2.37 | -2.17 | 208  |
| 42 | Serum albumin chain A                | P02768 | 5.9  | 82118  | 2.33  | 1.36  | 158  |
| 43 | Serotransferrin                      | P02787 | 6.36 | 91207  | 2.39  | -1.7  | 112  |
|    |                                      |        |      |        |       |       |      |
|    | <b>OTHER PROTEINS</b>                |        |      |        |       |       |      |
| 44 | Proteasome alpha sub isoform 2       | P25787 | 6.25 | 30575  | -2.25 | -1.52 | 142  |
| 45 | Glycogen phosphorylase               | P11217 | 6.78 | 110870 | -1.20 | 1.84  | 225  |
